# Supplementary material for: Metagenome from a Spirulina digesting biogas reactor: analysis via binning of contigs and classification of short reads
Source: PubMed Central journal article supplement (PMC4683858; doi:10.1186/s12866-015-0615-1), 2015-12-17
Supplement: 12866_2015_615_MOESM2_ESM.pdf [file 12866_2015_615_MOESM2_ESM.pdf]

# Metagenome analysis and biogas production from the anaerobic digestion of the protein rich microalga *Spirulina*

V. Nolla-Ardèvol, M. Peces, M. Strous, H.E. Tegetmeyer

## Supplementary tables

### Suppl. Table 1 RDP and SINA classification results for assembled and EMIRGE detected 16S rDNA sequences

Classification of 16S rDNA sequences with RDP and SINA sequence classifiers. Sequences are assigned with a minimum of 80% confidence for the RDP, for SINA with a minimum of 80% identity to reference sequences and 10 LCA neighbors.

| Sequence name  | 16S rDNA fragment length [bp] | Detected by/in | RDP classification (lowest classified rank)                                                                        | SINA classification (lowest classified rank)                            |
|----------------|-------------------------------|----------------|--------------------------------------------------------------------------------------------------------------------|-------------------------------------------------------------------------|
| FirmicutesEM-1 | 1425                          | EMIRGE         | Clostridiales: 1 / Clostridiales Incertae Sedis XI: 0.99 / <i>Tissierella</i> (genus): 0.99                        | Clostridiales; Family XI Incertae Sedis (family)                        |
| FirmicutesEM-2 | 1450                          | EMIRGE         | Clostridiales: 1 / Incertae Sedis XI: 0.87 / Clostridium XII (genus): 0.87                                         | Clostridiales; Family XI Incertae Sedis; <i>Tepidimicrobium</i> (genus) |
| FirmicutesEM-3 | 1357                          | EMIRGE         | Clostridia: 1 / Clostridiales: 0.98 / Clostridiales_Incertae Sedis XI: 0.95 / <i>Tepidimicrobium</i> (genus): 0.85 | Clostridia (class)                                                      |
| Contig01659    | 1559                          | Assembly A     | <i>Atopostipes</i> (genus): 1                                                                                      | <i>Atopostipes</i> (genus)                                              |
| Contig04220    | 1061                          | Assembly C     | Bacteria (Domain): 1                                                                                               | Firmicutes; OPB54 (class)                                               |
| Contig03630    | 1528                          | Assembly A     | Thermotogaceae: 1 / <i>Petrotoga</i> (Genus): 1                                                                    | Thermotogaceae (family)                                                 |
| Contig05284    | 1442                          | Assembly B     | Anaerolineaceae (family): 1                                                                                        | Anaerolineaceae (family); uncultured                                    |
| Contig00447    | 1512                          | Assembly C     | Porphyromonadaceae: 1 / <i>Proteiniphilum</i> (genus): 0.99                                                        | Porphyromonadaceae (family)                                             |
| Contig03141    | 1272                          | Assembly A     | Bacteroidetes: 1 / Flavobacteria: 0.82 / Flavobacteriales: 0.82 / Cryomorphaceae (family): 0,81                    | Bacteroidetes; Sphingobacteriia; <i>Sphingobacteriales</i> (order)      |
| Contig06470    | 925                           | Assembly A     | Methanomicrobia: 1 / Methanosarcinales: 1 / <i>Methanosarcina</i> (genus): 1                                       | Methanomicrobia (class)                                                 |
| Contig11126    | 551                           | Assembly B     | <i>Methanoculleus</i> (genus): 1                                                                                   | <i>Methanoculleus</i> (genus)                                           |

**Suppl. Table 2 Assembly depth values and classification results of selected contigs encoding 16S rDNA sequences**

Contig classification according to RDP and SINA classifiers. Similarity to EMIRGE detected 16S rDNA sequences is based on alignment (see phylogenetic tree topology in Additional File-1 Suppl. Figure 2).

| Bin                                                           | 16S contig | Assembly | Cov*       | RDP                         | SINA                        | EMIRGE | Bin Cov (X) |
|---------------------------------------------------------------|------------|----------|------------|-----------------------------|-----------------------------|--------|-------------|
| Unbinned                                                      | 01659      | A        | 11.4       | <i>Atopostipes</i>          | <i>Atopostipes</i>          |        | n.a         |
|                                                               | 06164      | B        | 8.4        |                             |                             |        |             |
|                                                               | 01612      | C        | 7.1        |                             |                             |        |             |
|                                                               | 20643      | A        | 158.9      | Clostridiales, Inc. Sed. XI | Clostridiales, Inc. Sed. XI | EM-1   |             |
|                                                               | 13029      | B        | 76.5       | <i>Tissierella</i>          | Clostridiales, Inc. Sed. XI |        |             |
|                                                               | 06646      | C        | 102.3      |                             |                             |        |             |
|                                                               | 13399      | B        | 141.4      | Clostridiales, Inc. Sed. XI | <i>Tepidimicrobium</i>      | EM-2   |             |
|                                                               | 04208      | C        | 164.2      |                             |                             |        |             |
| 04220                                                         | C          | 33.4     | Clostridia | Firmicutes; OPB54           |                             |        |             |
| D                                                             | 03740      | A        | 38.2       | <i>Proteiniphilum</i>       | <i>Proteiniphilum</i>       |        | 22.3        |
|                                                               | 03861      | B        | 25.8       |                             |                             |        |             |
|                                                               | 00447      | C        | 18.5       |                             | Porphyromonadaceae          |        |             |
| E                                                             | 05284      | B        | 24.6       | Anaerolineaceae             | Unc. Anaerolineaceae        |        | 33.3        |
|                                                               | 02468      | B        | 25         |                             |                             |        |             |
| F                                                             | 03630      | A        | 50.3       | <i>Petrotoga</i>            | Thermotogaceae              |        | 23.4        |
|                                                               | 03105      | B        | 34.4       |                             |                             |        |             |
|                                                               | 03129      | C        | 26.1       |                             |                             |        |             |
| H                                                             | 03141      | A        | 8.9        | Cryomorphaceae              | Sphingobacteriales          |        | 11.5        |
|                                                               | 10506      | B        | 6.9        | Flavobacteria               | Bacteroidetes               |        |             |
|                                                               | 02933      | C        | 5.5        | Cryomorphaceae              | Sphingobacteriales          |        |             |
| * Assembly depth value from Newbler output<br>Unc: Uncultured |            |          |            |                             |                             |        |             |

### Suppl. Table 3 Taxonomic classification of metagenomic reads

Classification of reads from datasets “*Spirulina-S1*” and “MR” with the MG-Rast metagenome analyzer. Listed are the 10 most abundant bacteria and 3 most abundant archaea of both datasets based on the M5NR database with a  $1e^{-5}$  E-value cutoff, a 60% minimum identity and 15 bp minimum length reads.

| <b>Spirulina-S1 dataset</b> |                        |                         |                               |             |
|-----------------------------|------------------------|-------------------------|-------------------------------|-------------|
| <b>Class</b>                | <b>Order</b>           | <b>Family</b>           | <b>Genus</b>                  | <b>Hits</b> |
| <b>Bacteria</b>             |                        |                         |                               |             |
| Clostridia                  | Clostridiales          | Clostridiaceae          | <i>Alkaliphilus</i>           | 39255       |
|                             |                        |                         | <i>Clostridium</i>            | 89870       |
| Bacteroidia                 | Bacteroidales          | Bacteroidaceae          | <i>Bacteroides</i>            | 25932       |
| Clostridia                  | Clostridiales          | Peptostreptococcaceae   | <i>Peptostreptococcaceae</i>  | 21781       |
| Bacilli                     | Bacillales             | Bacillaceae             | <i>Bacillus</i>               | 20918       |
| Thermotogae                 | Thermotogales          | Thermotogaceae          | <i>Petrotoga</i>              | 20262       |
| Clostridia                  | Clostridiales          | Fam XI Insertae Sedis   | <i>Peptoniphilus</i>          | 12495       |
|                             | Thermoanaerobacterales | Thermoanaerobacteraceae | <i>Caldanaerobacter</i>       | 11096       |
| Anaerolineae                | Anaerolineales         | Anaerolineaceae         | <i>Anaerolinea</i>            | 8033        |
| Clostridia                  | Clostridiales          | Peptococcaceae          | <i>Desulfitobacterium</i>     | 6833        |
| <b>Archaea</b>              |                        |                         |                               |             |
| Methanomicrobia             | Methanosarcinales      | Methanosarcinaceae      | <i>Methanosarcina</i>         | 5122        |
|                             | Methanomicrobiales     | Methanomicrobiaceae     | <i>Methanoculleus</i>         | 3997        |
| Methanococci                | Methanococcales        | Methanococcaceae        | <i>Methanococcus</i>          | 431         |
| <b>Maize-Rye dataset</b>    |                        |                         |                               |             |
| <b>Bacteria</b>             |                        |                         |                               |             |
| Clostridia                  | Clostridiales          | Clostridiaceae          | <i>Clostridium</i>            | 114140      |
| Bacteroidia                 | Bacteroidales          | Bacteroidaceae          | <i>Bacteroides</i>            | 47051       |
| Unclassified                | Unclassified           | Unclassified            | <i>Candidatus Cloacamonas</i> | 36032       |
| Bacilli                     | Bacillales             | Bacillaceae             | <i>Bacillus</i>               | 32446       |
| Clostridia                  | Clostridiales          | Clostridiaceae          | <i>Alkaliphilus</i>           | 18065       |
| Bacteroidia                 | Bacteroidales          | Porphyromonadaceae      | <i>Parabacteroides</i>        | 16365       |
| Clostridia                  | Clostridiales          | Peptococcaceae          | <i>Desulfotomaculum</i>       | 16053       |
|                             |                        |                         | <i>Desulfitobacterium</i>     | 13461       |
|                             |                        |                         | <i>Pelotomaculum</i>          | 12639       |
| Bacilli                     | Bacillales             | Bacillaceae             | <i>Geobacillus</i>            | 11970       |
| <b>Archaea</b>              |                        |                         |                               |             |
| Methanomicrobia             | Methanomicrobiales     | Methanomicrobiaceae     | <i>Methanoculleus</i>         | 54153       |
|                             | Methanosarcinales      | Methanosarcinaceae      | <i>Methanosarcina</i>         | 4768        |
|                             | Methanomicrobiales     | Methanomicrobiaceae     | <i>Methanoplanus</i>          | 4062        |

### Suppl. Table 4 Identified Pfams related to cellulose degradation

Number of cellulose degradation Pfams identified with the hmmscan tool with a 1.0 E-value cutoff in each dataset.

| Pfam    | ID              | Function                    | <i>Spirulina</i> -S1 dataset | M-R dataset* |
|---------|-----------------|-----------------------------|------------------------------|--------------|
| PF00150 | Cellulase       | Hydrolyses glycosidic bond  | 61                           | 304          |
| PF00331 | Glyco_hydro_10  | Hydrolyses glycosidic bond  | 34                           | 429          |
| PF00404 | Dockerin_1      | Cellulosome structure       | 188                          | 316          |
| PF00457 | Glyco_hydro_11  | Hydrolyses glycosidic bond  | 2                            | 36           |
| PF00553 | CBM_2           | Carbohydrate binding module | 15                           | 80           |
| PF00703 | Glyco_hydro_2   | Carbohydrate degradation    | 56                           | 254          |
| PF00704 | Glyco_hydro_18  | Hydrolyses glycosidic bond  | 150                          | 309          |
| PF00722 | Glyco_hydro_16  | Carbohydrate degradation    | 41                           | 100          |
| PF00734 | CBM_1           | Carbohydrate binding domain | 78                           | 139          |
| PF00759 | Glyco_hydro_9   | Hydrolyses glycosidic bond  | 3                            | 81           |
| PF00840 | Glyco_hydro_7   | Hydrolyses glycosidic bond  | 3                            | 11           |
| PF00933 | Glyco_hydro_3   | Carbohydrate degradation    | 358                          | 908          |
| PF00942 | CBM_3           | Carbohydrate binding module | 17                           | 27           |
| PF01183 | Glyco_hydro_25  | Carbohydrate degradation    | 31                           | 37           |
| PF01270 | Glyco_hydro_8   | Hydrolyses glycosidic bond  | 11                           | 56           |
| PF01341 | Glyco_hydro_6   | Hydrolyses glycosidic bond  | 1                            | 16           |
| PF01464 | SLT             | Carbohydrate degradation    | 169                          | 320          |
| PF02011 | Glyco_hydro_48  | Hydrolyses glycosidic bond  | 4                            | 18           |
| PF02013 | CBM_10          | Carbohydrate binding domain | 24                           | 34           |
| PF02015 | Glyco_hydro_45  | Hydrolyses glycosidic bond  | 3                            | 2            |
| PF02018 | CBM_4_9         | Carbohydrate binding module | 31                           | 446          |
| PF02055 | Glyco_hydro_30  | Hydrolyses glycosidic bond  | 14                           | 67           |
| PF02156 | Glyco_hydro_26  | Hydrolyses glycosidic bond  | 7                            | 38           |
| PF02836 | Glyco_hydro_2_C | Hydrolyses glycosidic bond  | 202                          | 483          |
| PF02837 | Glyco_hydro_2_N | Hydrolyses glycosidic bond  | 166                          | 529          |
| PF02839 | CBM_5_12        | Carbohydrate binding module | 74                           | 104          |
| PF03422 | CBM_6           | Carbohydrate binding module | 29                           | 249          |
| PF03442 | CBM_X2          | Carbohydrate binding module | 5                            | 79           |
| PF03443 | Glyco_hydro_61  | Hydrolyses glycosidic bond  | 2                            | 1            |
| PF04616 | Glyco_hydro_43  | Hydrolyses glycosidic bond  | 72                           | 1008         |
| PF12891 | Glyco_hydro_44  | Hydrolyses glycosidic bond  | 4                            | 21           |
| PF14587 | Glyco_hydr_30_2 | Hydrolyses glycosidic bond  | 10                           | 20           |
| PF14600 | CBM_5_12_2      | Carbohydrate binding module | 16                           | 32           |

\* M-R: Maize-Rye dataset

### Suppl. Table 5 Identified Pfams related to protein degradation

Number of protein degradation Pfams identified with the hmmscan tool with a 1.0 E-value cutoff in each dataset.

| Pfam    | ID              | Function                         | <i>Spirulina</i> -S1 dataset | M-R dataset* |
|---------|-----------------|----------------------------------|------------------------------|--------------|
| PF00082 | Peptidase_S8    | Peptide degradation              | 770                          | 900          |
| PF00089 | Trypsin         | Protein degradation              | 198                          | 425          |
| PF00246 | Peptidase_M14   | Peptide degradation              | 117                          | 207          |
| PF00326 | Peptidase_S9    | Peptide degradation              | 496                          | 1019         |
| PF00413 | Peptidase_M10   | Peptide degradation              | 36                           | 97           |
| PF00450 | Peptidase_S10   | Peptide degradation              | 10                           | 31           |
| PF00557 | Peptidase_M24   | Peptide degradation              | 586                          | 1054         |
| PF01400 | Astacin         | Degradation of polypeptides      | 9                            | 12           |
| PF01431 | Peptidase_M13   | Peptide degradation              | 47                           | 164          |
| PF01434 | Peptidase_M41   | Peptide degradation              | 672                          | 847          |
| PF01447 | Peptidase_M4    | Peptide degradation              | 3                            | 18           |
| PF01546 | Peptidase_M20   | Peptide degradation              | 878                          | 1276         |
| PF01551 | Peptidase_M23   | Peptide degradation              | 801                          | 1273         |
| PF02031 | Peptidase_M7    | Peptide degradation              | 2                            | 47           |
| PF02868 | Peptidase_M4_C  | Peptide degradation              | 10                           | 9            |
| PF03070 | TENA_THI-4      | Secretion extracellular enzymes  | 10                           | 31           |
| PF03575 | Peptidase_S51   | Peptide degradation              | 37                           | 78           |
| PF04389 | Peptidase_M28   | Peptide degradation              | 219                          | 531          |
| PF05134 | T2SL            | Secretion of proteases           | 20                           | 14           |
| PF05257 | CHAP            | Peptidoglycan hydrolysis         | 31                           | 60           |
| PF05342 | Peptidase_M26_N | Peptide degradation              | 12                           | 32           |
| PF05362 | Lon_C           | Peptide degradation              | 363                          | 852          |
| PF05543 | Peptidase_C47   | Peptide degradation              | 6                            | 3            |
| PF05548 | Peptidase_M11   | Peptide degradation              | 4                            | 7            |
| PF05569 | Peptidase_M56   | Peptide degradation              | 268                          | 230          |
| PF05576 | Peptidase_S37   | Peptide degradation              | 2                            | 13           |
| PF05577 | Peptidase_S28   | Peptide degradation              | 33                           | 34           |
| PF05649 | Peptidase_M13_N | Peptide degradation              | 31                           | 156          |
| PF06480 | FtsH_ext        | Membrane bound protease          | 88                           | 223          |
| PF07502 | MANEC           | Protease activator and inhibitor | 11                           | 15           |
| PF07580 | Peptidase_M26_C | Peptide degradation              | 2                            | 4            |
| PF07687 | M20_dimer       | Peptide degradation              | 610                          | 584          |
| PF08548 | Peptidase_M10_C | Peptide degradation              | 6                            | 7            |
| PF12388 | Peptidase_M57   | Peptide degradation              | 8                            | 28           |
| PF13365 | Trypsin_2       | Peptide degradation              | 288                          | 539          |
| PF13485 | Peptidase_MA_2  | Peptide degradation              | 245                          | 370          |
| PF13529 | Peptidase_C39_2 | Peptide degradation              | 109                          | 129          |
| PF13574 | Reprolysin_2    | Peptide degradation              | 40                           | 43           |
| PF13582 | Reprolysin_3    | Peptide degradation              | 51                           | 93           |
| PF13583 | Reprolysin_4    | Peptide degradation              | 19                           | 43           |

\* M-R: Maize-Rye dataset

### Suppl. Table 6 Identified Pfams related to amino acid degradation

Number of amino acid degradation Pfams identified with the hmmscan tool with a 1.0 E-value cutoff in each dataset.

| Pfam    | ID              | Function                       | <i>Spirulina</i> -S1 dataset | M-R dataset* |
|---------|-----------------|--------------------------------|------------------------------|--------------|
| PF00056 | Ldh_1_N         | Lactate/malate dehydrogenase   | 146                          | 390          |
| PF00070 | Pyr_redux       | Oxidoreductases                | 1254                         | 2574         |
| PF00155 | Aminotran_1_2   | Aminotransferase               | 1372                         | 2613         |
| PF00185 | OTCace          | Transferring one-carbon groups | 282                          | 482          |
| PF00205 | TPP_enzyme_M    | Thiamine binding               | 134                          | 460          |
| PF00208 | ELFV_dehydrog   | Glutamate catabolism           | 590                          | 882          |
| PF00291 | PALP            | Amino acid metabolism          | 934                          | 1024         |
| PF01053 | Cys_Met_Meta_P  | Amino acid metabolism          | 1383                         | 1166         |
| PF01212 | Beta_elim_lyase | Degradation of amino acids     | 767                          | 1391         |
| PF01571 | GCV_T           | Degradation of amino acids     | 334                          | 375          |
| PF02254 | TrkA_N          | Transporter                    | 671                          | 1608         |
| PF02347 | GDC-P           | Degradation of amino acids     | 598                          | 713          |
| PF02729 | OTCace_N        | Transferring one-carbon groups | 302                          | 362          |
| PF02812 | ELFV_dehydrog_  | Glutamate catabolism           | 304                          | 289          |
| PF02852 | Pyr_redux_dim   | Oxidoreductases                | 377                          | 367          |
| PF02866 | Ldh_1_C         | Lactate/malate dehydrogenase   | 37                           | 111          |
| PF03313 | SDH_alpha       | Degradation of amino acids     | 462                          | 337          |
| PF03315 | SDH_beta        | Degradation of amino acids     | 126                          | 135          |
| PF04898 | Glu_syn_central | Amino acid metabolism          | 9                            | 54           |
| PF04960 | Glutaminase     | Amino acid metabolism          | 188                          | 156          |
| PF05995 | CDO_I           | Amino acid metabolism          | 16                           | 22           |
| PF07085 | DRTGG           | Amino acid metabolism          | 111                          | 196          |
| PF08669 | GCV_T_C         | Degradation of amino acids     | 90                           | 183          |
| PF12544 | LAM_C           | Amino acid metabolism          | 141                          | 162          |

\* M-R: Maize-Rye dataset

**Suppl. Table 7 Accession numbers of reference 16S rDNA sequences in phylogenetic trees**

Accession numbers of reference 16S rDNA sequences for which in the phylogenetic trees (Fig. 2) only organism names are shown.

| Organism name                                             | Accession                            |
|-----------------------------------------------------------|--------------------------------------|
| <i>Arthrospira platensis</i> C1                           | gi 423061881:1247729-1249205         |
| <i>Tepidimicrobium ferriphilum</i> strain SB91            | gi 343198615 ref NR_043077.1         |
| <i>Atopostipes suicloacalis</i> strain PPC79              | gi 265678531 ref NR_028835.1         |
| <i>Clostridium ultunense</i> strain BS                    | gi 219846939 ref NR_026531.1         |
| <i>Tissierella praeacuta</i> strain NCTC 11158            | gi 343206268 ref NR_044860.1         |
| <i>Gelria glutamica</i> strain TGO                        | gi 343201113 ref NR_041819.1         |
| <i>Alkaliphilus crotonoxidans</i>                         | gi 19072573 gb AF467248.1            |
| <i>Bacillus subtilis</i> subsp. <i>subtilis</i> str. BSP1 | gb CP003695.1 :comp(3947493-3945959) |
| <i>Symbiobacterium thermophilum</i> IAM 14863             | gi 444439729 ref NR_075044.1         |
| <i>Clostridium cellulolyticum</i> H10 strain H10          | gi 507147961 ref NR_102768.1         |
| <i>Clostridium thermocellum</i> ATCC 27405                | gi 444304204 ref NR_074629.1         |
| <i>Moorella glycerini</i> strain JW/AS-Y6                 | gi 265678890 ref NR_029198.1         |
| <i>Petrotoga mobilis</i> SJ95 strain SJ95                 | gi 444303977 ref NR_074401.1         |
| <i>Levilinea saccharolytica</i> strain KIBI-1             | gi 343200285 ref NR_040972.1         |
| <i>Proteiniphilum acetatigenes</i> strain TB107           | gi 343202727 ref NR_043154.1         |
| <i>Owenweeksia hongkongensis</i> DSM 17368                | gi 470466026 ref NR_074100.1         |
| <i>Anaerolinea thermophila</i> UNI-1 strain UNI-1         | gi 444303960 ref NR_074383.1         |
| <i>Thermotoga lettingae</i> TMO strain TMO                | gi 444439636 ref NR_074951.1         |
| <i>Bacteroides paurosaccharolyticus</i> JCM 15092         | gi 166063925 dbj AB298727.2          |
| <i>Alistipes finegoldii</i> DSM 17242                     | gi 507148137 ref NR_102944.1         |
| <i>Fluviicola taffensis</i> DSM 16823                     | gi 444304123 ref NR_074547.1         |
| <i>Methanosarcina siciliae</i> strain T4/M                | gi 559795168 ref NR_104757.1         |
| <i>Methanoculleus marisnigri</i> JR1 strain JR1           | gi 470467424 ref NR_074174.1         |
| <i>Methanospirillum hungatei</i> JF-1 strain JF-1         | gi 470467480 ref NR_074177.1         |
| <i>Methanobacterium flexile</i> strain GH                 | gi 304336835 gb EU333914.2           |
| <i>Methanosaeta concilii</i> strain Opfikon               | gi 254971324 ref NR_028242.1         |
| <i>Methanocorpusculum parvum</i> strain DSM 3823          | gi 343206139 ref NR_044728.1         |
| <i>Methanothermobacter marburgensis</i> strain Marburg    | gi 254971323 ref NR_028241.1         |
| <i>Methanolobus oregonensis</i> strain WAL 1              | gi 254971319 ref NR_028237.1         |
| <i>Methanococcus maripaludis</i>                          | gi 1145365 gb U38484.1               |
| <i>Methanopyrus kandleri</i> AV19 strain AV19             | gi 444304115 ref NR_074539.1         |
